# Supplementary material for: Real-world use of rescue inhaler sensors, electronic symptom questionnaires and physical activity monitors in COPD
Source: PubMed Central journal article supplement — BMJ Open Respir Res. 2019 Feb 18;6(1):e000350. doi: 10.1136/bmjresp-2018-000350 (PMC6424295; doi:10.1136/bmjresp-2018-000350), 2019-02-18

**Supplemental Table 1:** Spearman correlations of steps and daily symptoms with 5-year clinical measures for COPD patients (GOLD I-IV), overall and split by daily oxygen use

|                                    | <i>COPD I-IV</i>     |                  | <i>COPD I-IV, oxygen use</i> |                  | <i>COPD I-IV, no oxygen</i> |                  |
|------------------------------------|----------------------|------------------|------------------------------|------------------|-----------------------------|------------------|
|                                    | <i>n=82</i>          |                  | <i>n=49</i>                  |                  | <i>n=33</i>                 |                  |
|                                    | <b>Steps, median</b> | <b>E-RS mean</b> | <b>Steps, median</b>         | <b>E-RS mean</b> | <b>Steps, median</b>        | <b>E-RS mean</b> |
| <b>Steps, median</b>               | <b>1.00</b>          | -0.05            | <b>1.00</b>                  | -0.09            | <b>1.00</b>                 | 0.20             |
| <b>E-RS mean</b>                   | -0.05                | <b>1.00</b>      | -0.09                        | <b>1.00</b>      | 0.20                        | <b>1.00</b>      |
| <b>Rescue occasions, mean</b>      | -0.03                | <i>0.52</i>      | 0.05                         | <i>0.53</i>      | -0.02                       | <i>0.48</i>      |
| <b>6MWD</b>                        | <i>0.60</i>          | -0.34            | <i>0.53</i>                  | -0.31            | <i>0.51</i>                 | -0.21            |
| <b>FEV<sub>1</sub> % predicted</b> | <i>0.33</i>          | -0.29            | <i>0.38</i>                  | -0.35            | -0.15                       | 0.06             |
| <b>SF-36 Physical Function</b>     | <i>0.30</i>          | -0.48            | 0.28                         | -0.60            | 0.10                        | -0.11            |
| <b>CAT</b>                         | -0.15                | <i>0.72</i>      | -0.24                        | <i>0.68</i>      | 0.23                        | <i>0.69</i>      |
| <b>SGRQ</b>                        | -0.20                | <i>0.71</i>      | -0.25                        | <i>0.69</i>      | 0.23                        | <i>0.65</i>      |
| <b>MMRC</b>                        | -0.29                | <i>0.60</i>      | -0.38                        | <i>0.54</i>      | 0.19                        | <i>0.54</i>      |
| <b>Emphysema %LAA</b>              | -0.33                | 0.16             | -0.47                        | 0.14             | 0.14                        | 0.15             |
| <b>Lung density</b>                | <i>0.30</i>          | -0.15            | <i>0.46</i>                  | -0.14            | -0.17                       | -0.11            |
| <b>Age</b>                         | -0.20                | -0.14            | 0.20                         | -0.29            | -0.58                       | -0.05            |

|                   |              |             |              |             |       |       |
|-------------------|--------------|-------------|--------------|-------------|-------|-------|
| <b>BMI</b>        | -0.12        | -0.15       | -0.02        | -0.21       | -0.13 | -0.19 |
| <b>Oxygen use</b> | <i>-0.48</i> | <i>0.27</i> | <i>-0.56</i> | <i>0.17</i> |       |       |

Italicized values have  $p < 0.05$ .

**Supplemental Table 2:** Baseline clinical characteristics and study summary measures split by rescue medication use pattern

|                                      | Scheduled use (n=9) | No pattern, frequent use (n=17) | No pattern, infrequent use (n=22) | Bad days (n=3) | p-value |
|--------------------------------------|---------------------|---------------------------------|-----------------------------------|----------------|---------|
| <b>Clinical Characteristics</b>      |                     |                                 |                                   |                |         |
| Age (years)                          | 68 (6)              | 64 (7)                          | 64 (8)                            | 63 (2)         | 0.478   |
| Male, n (%)                          | 4 (44%)             | 7 (41%)                         | 9 (41%)                           | 1 (33%)        | 0.990   |
| Body mass index (kg/m <sup>2</sup> ) | 26 (4)              | 28 (6)                          | 32 (8)                            | 38 (7)         | 0.030   |
| Current Smoker, n (%)                | 2 (22%)             | 7 (41%)                         | 5 (23%)                           | 1 (33%)        | 0.603   |
| Smoking Pack-year history            | 48 (26)             | 50 (34)                         | 52 (24)                           | 61 (64)        | 0.899   |
| FEV <sub>1</sub> , (% predicted)     | 51 (21)             | 45 (17)                         | 62 (24)                           | 67 (21)        | 0.072   |
| 6-minute walking distance (m)        | 406 (79)            | 312 (126)                       | 366 (151)                         | 359 (198)      | 0.378   |
| BODE index                           | 3.1 (1.2)           | 3.5 (1.4)                       | 2.1 (2.0)                         | 1.7 (2.1)      | 0.050   |
| Emphysema LAA% (-950HU)              | 17 (18)             | 8 (7)                           | 8 (11)                            | 5 (5)          | 0.340   |
| Lung density (g/L)                   | 54 (23)             | 68 (22)                         | 72 (21)                           | 72 (10)        | 0.349   |

|                                     |                  |                  |                 |                  |       |
|-------------------------------------|------------------|------------------|-----------------|------------------|-------|
| Pi10 (mm)                           | 3.6 (0.1)        | 3.7 (0.1)        | 3.6 (0.1)       | 3.7 (0.1)        | 0.396 |
| MMRC dyspnea score $\geq 2$ , n (%) | 8 (89%)          | 16 (94%)         | 14 (64%)        | 2 (67%)          | 0.301 |
| SGRQ total score                    | 40 (16)          | 54 (19)          | 34 (17)         | 32 (34)          | 0.013 |
| Prior Year Exacerbation History     | 0.4 (0.5)        | 1.4 (1.5)        | 1.4 (1.6)       | 0.0 (0.0)        | 0.157 |
| <b>Outcome Measures</b>             |                  |                  |                 |                  |       |
| Steps per day, median [IQR]         | 3072 [1566-4433] | 1607 [1124-5616] | 2136 [617-4652] | 9582 [195-12184] | 0.859 |
| Calories, median [IQR]              | 1289 [952-1651]  | 1767 [1094-2129] | 1666 [994-2216] | 2110 [1314-3779] | 0.349 |
| E-RS:COPD score                     | 13.3 (6.3)       | 16.7 (5.4)       | 10.1 (4.9)      | 7.8 (3.0)        | 0.002 |
| Mean rescue Occasions/day           | 2.2 (1)          | 3.5 (2.1)        | 0.2 (0.2)       | 0.6 (0.3)        | N/A   |

**Supplemental Figure 1: Correlation of Weekly Mean E:RS-COPD scores**

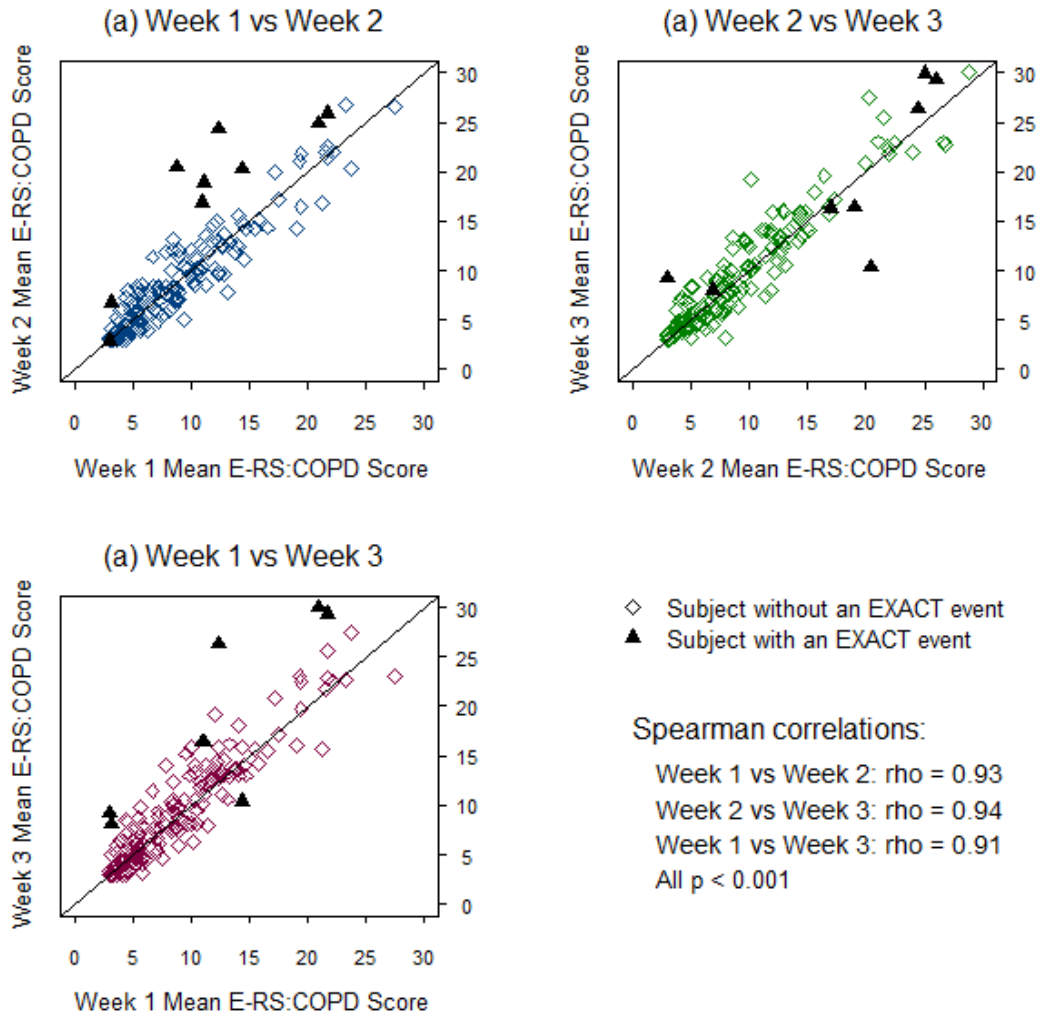

**Supplemental Figure 2: Correlation of Weekly Median Step Counts**

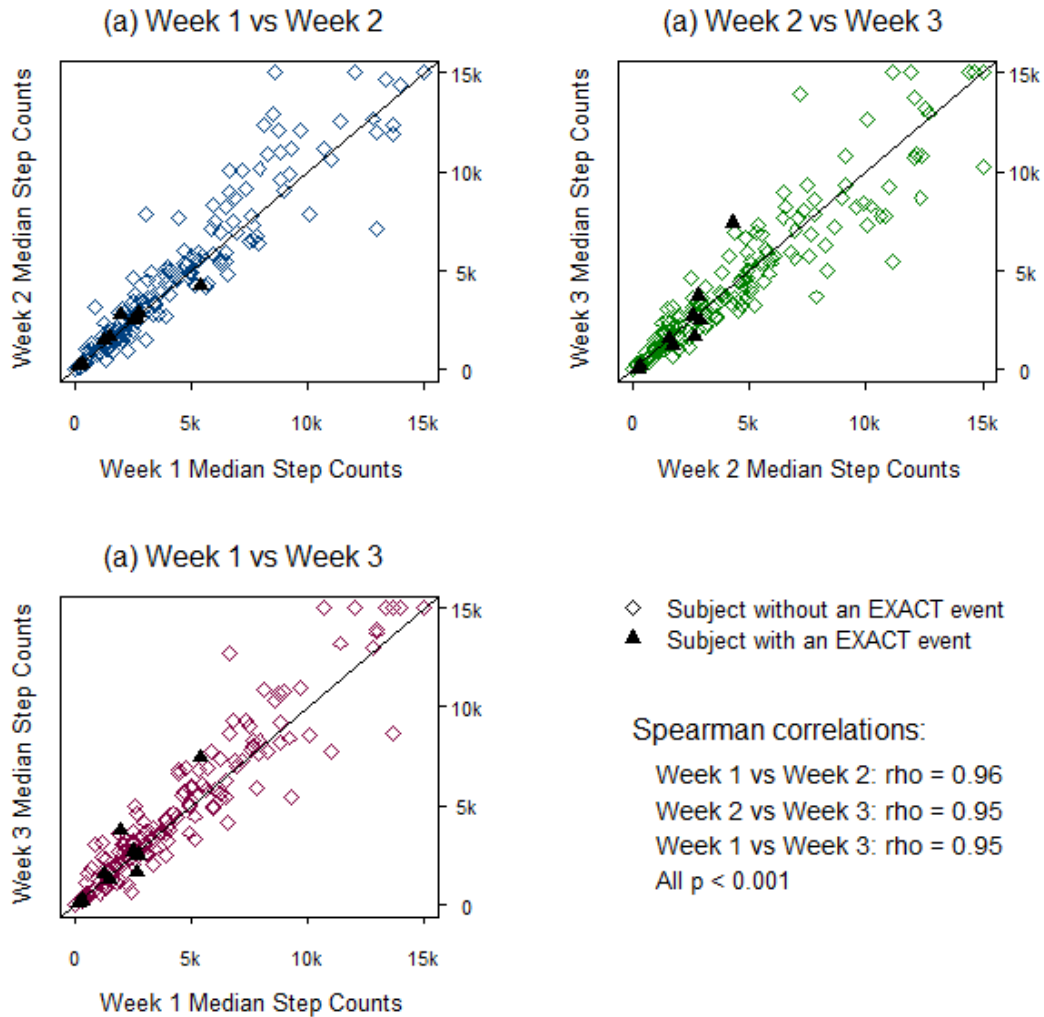

**Supplemental Figure 3: Correlation of Weekly Mean Rescue Use (occasions per day)**

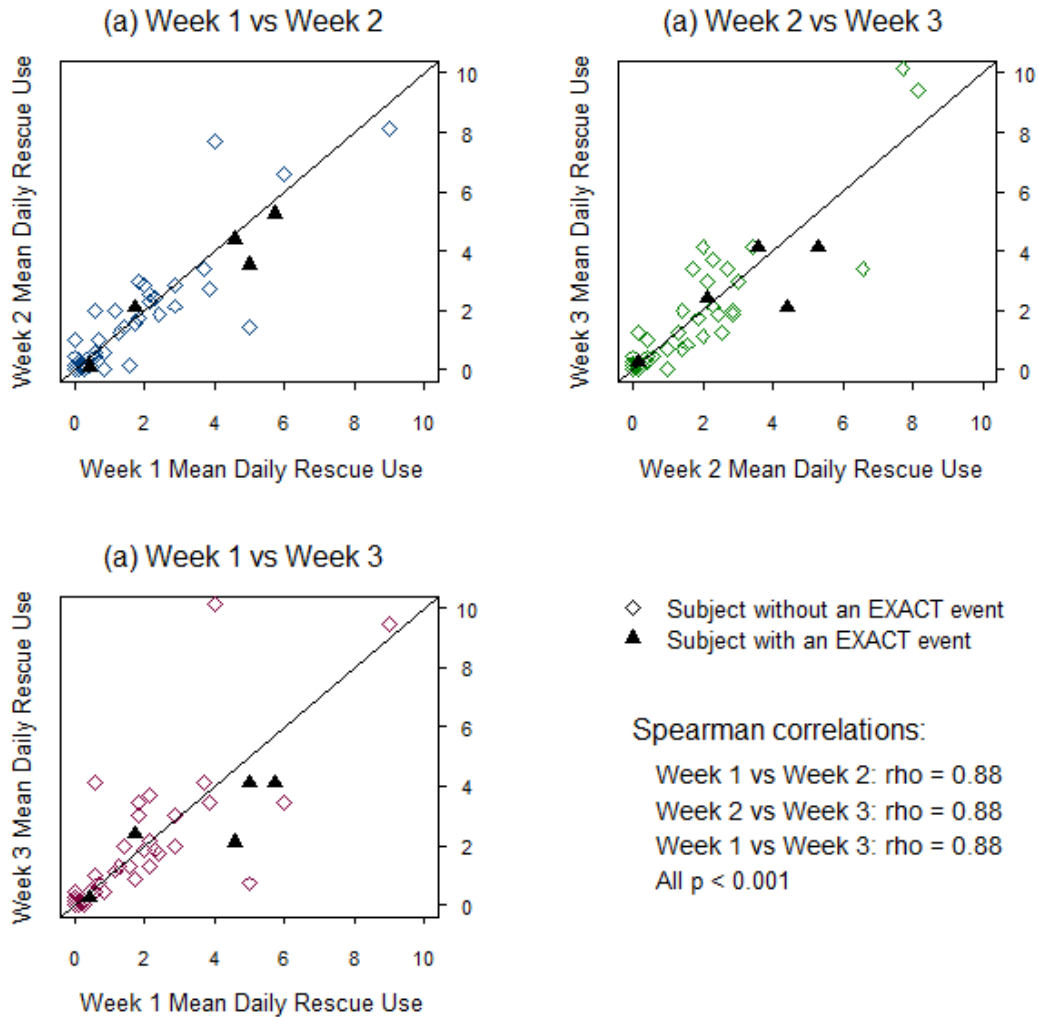

**Supplemental Figure 4:** Association of self-reported difficulty with activity (PROactive Rasch Difficulty Score) with (a) mean rescue occasions and (b) E-RS:COPD score.

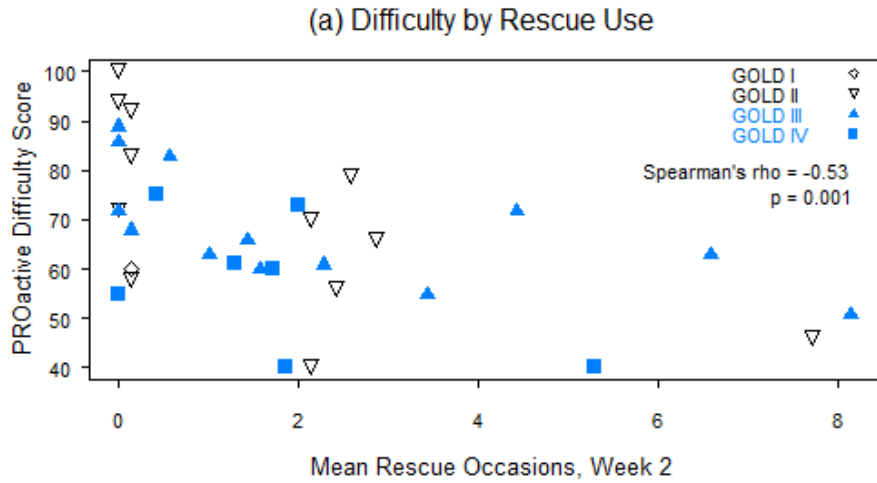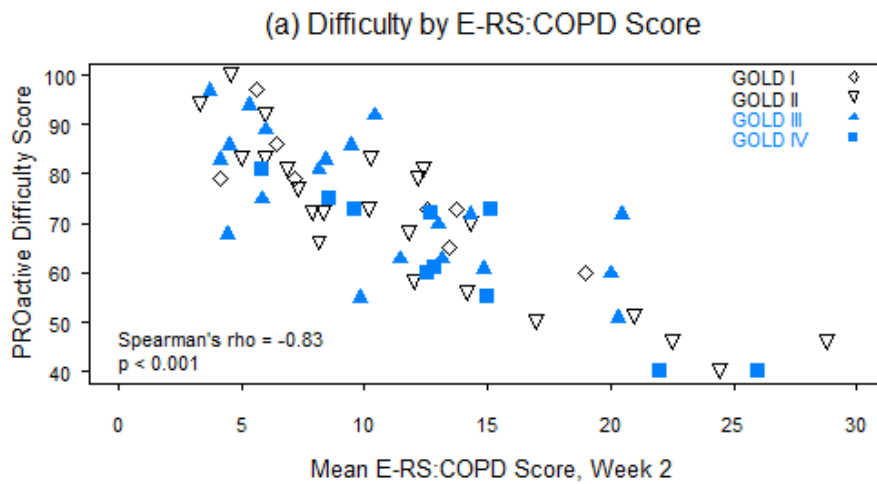

**Supplemental Figure 5:** Additional daily use profiles for participants with EXACT-defined events.

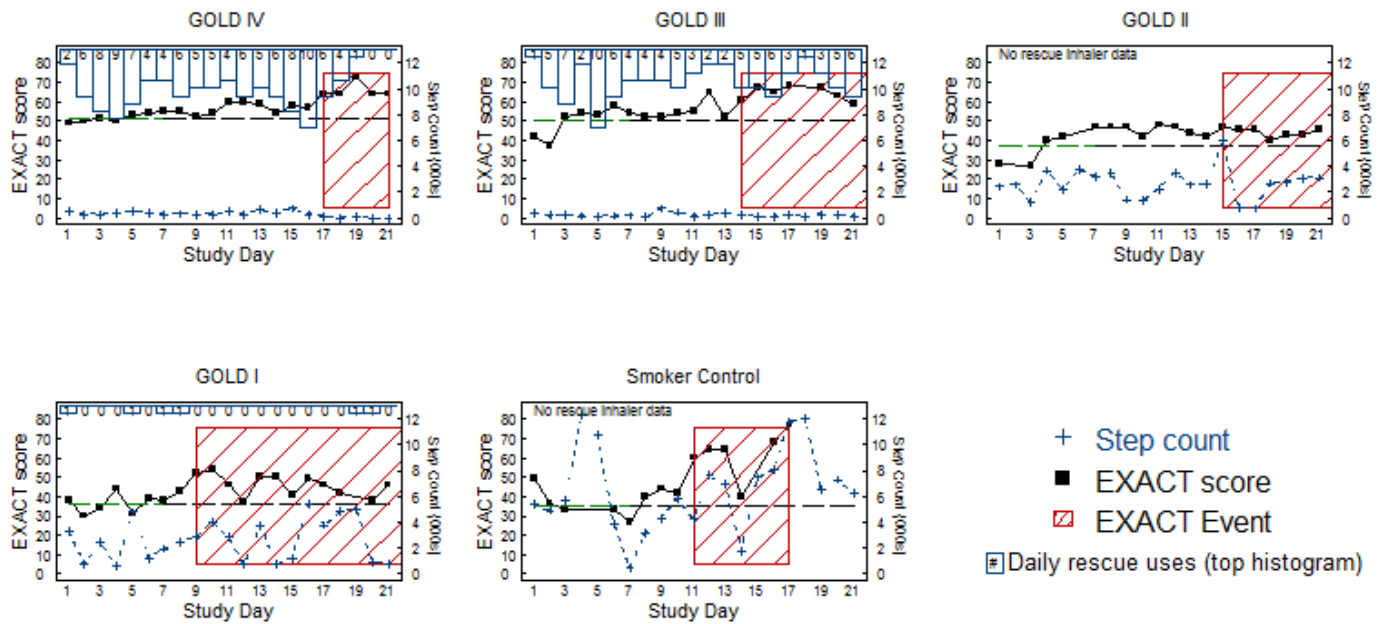

Supplement: bmjresp-2018-000350supp001.pdf [file bmjresp-2018-000350supp001.pdf]
